# Supplementary material
Source: PubMed Central journal article supplement (PMC4553932)

Supplementary Figure S1: Phenotypic distribution from individual crosses. (A) Total CCT of N2 mice. (B) Total CCT of F2 mice. Frequency, number of mice; CCT is measured in micrometers.

**A**

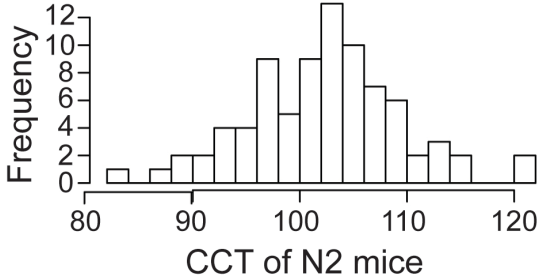

**B**

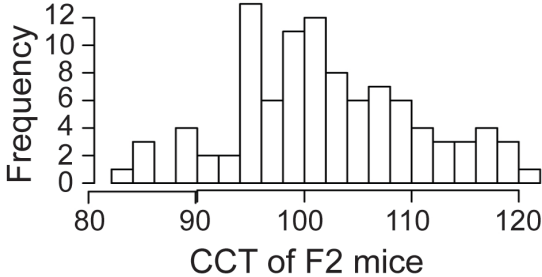

Supplement: i1552-5783-56-9-5599-s01.pdf [file i1552-5783-56-9-5599-s01.pdf]
