# Supplementary material
Source: PubMed Central journal article supplement (PMC4553932)

Supplementary Figure S2: Genome-wide scans of N2 cross. (A) Total CCT. A significant locus is observed on Chr 11; suggestive loci are observed on Chr 6 and Chr 19. (B) Epithelial thickness. No significant or suggestive loci were identified. (C) Stromal thickness. The locus on Chr 11 is significant and the locus on Chr 19 is suggestive. Significance thresholds are as follows: solid line,  $p = 0.01$ ; dashed-dotted,  $p = 0.05$ ; dotted,  $p = 0.1$ ; dashed,  $p = 0.63$ .

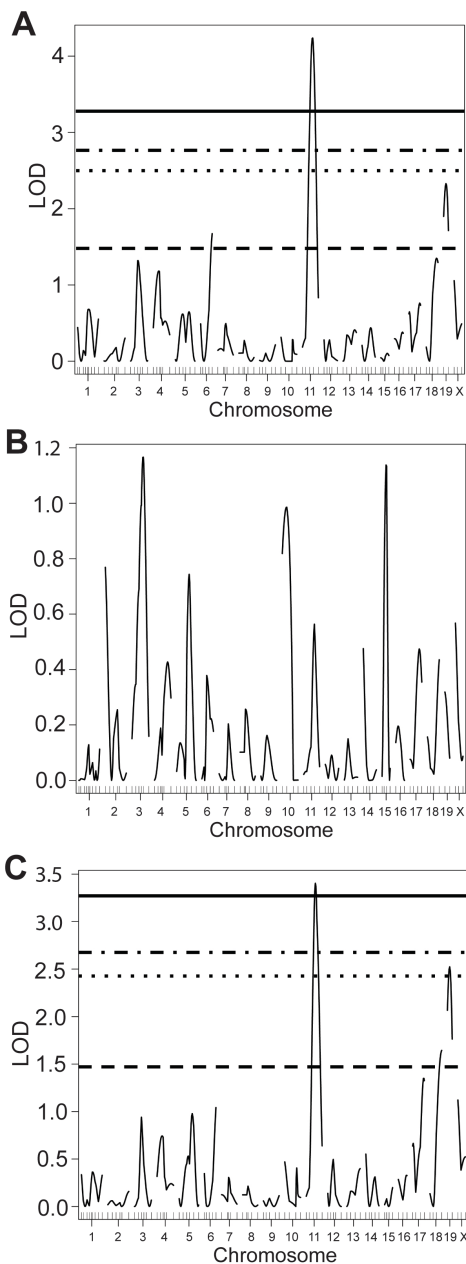

Supplement: i1552-5783-56-9-5599-s02.pdf [file i1552-5783-56-9-5599-s02.pdf]
