# Supplementary material
Source: PubMed Central journal article supplement (PMC4553932)

Supplementary Figure S3: Genome wide scans of F2 cross. (A) Total CCT. Suggestive loci are observed on Chr 3, 11, 12, 13, and 14. (B) Epithelial thickness. A significant locus is identified on Chr 3. (C) Stromal thickness. A suggestive locus is observed on Chr 11. Significance thresholds are as follows: solid line,  $p = 0.01$ ; dashed-dotted,  $p = 0.05$ ; dotted,  $p = 0.1$ ; dashed,  $p = 0.63$ .

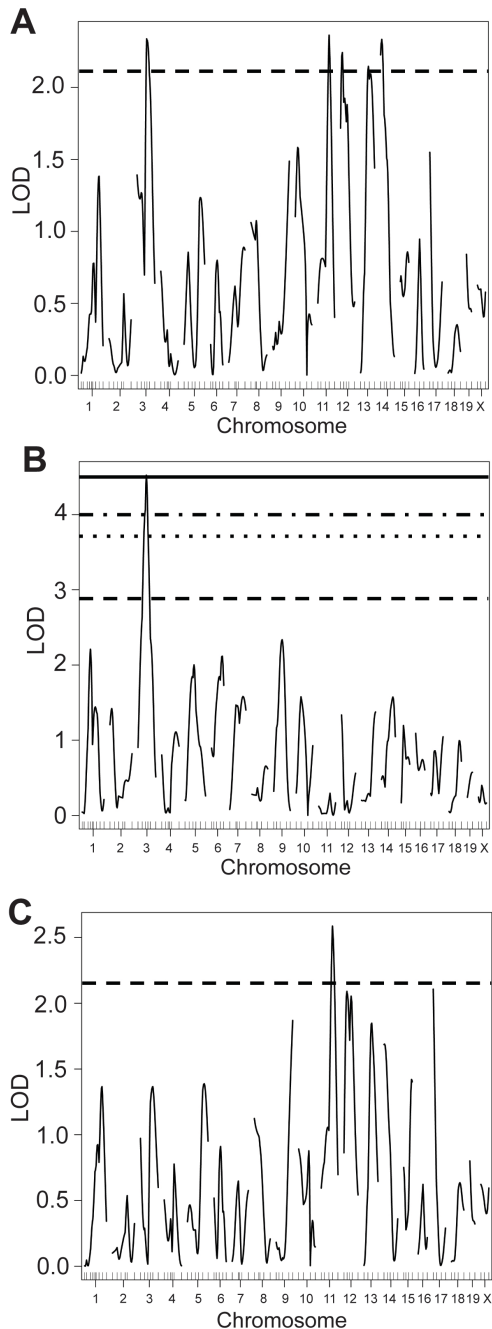

Supplement: i1552-5783-56-9-5599-s03.pdf [file i1552-5783-56-9-5599-s03.pdf]
